# Supplementary material for: Characterization of Nontypable Haemophilus influenzae Isolates Recovered from Adult Patients with Underlying Chronic Lung Disease Reveals Genotypic and Phenotypic Traits Associated with Persistent Infection
Source: PubMed Central journal article supplement (PMC4019658; doi:10.1371/journal.pone.0097020), 2014-05-13
Supplement: pone.0097020.s001.pdf [file pone.0097020.s001.pdf]

**Table S2.** Self-aggregation of NTHi strains (t=h).

| Patient | Strain              | 0         | 1                      | 1.5                    | 2                      | 3                      | 4                      | 5                      | 6                      | 7                      |
|---------|---------------------|-----------|------------------------|------------------------|------------------------|------------------------|------------------------|------------------------|------------------------|------------------------|
|         | <i>E. coli</i> C600 | 1,03±0,04 | 0,99±0,05              | 0,97±0,04              | 0,97±0,03              | 0,99±0,03              | 0,98±0,02              | 0,98±0,03              | 1±0,04                 | 0,990±05               |
| 1       | NTHi1a              | 1,02±0,05 | 0,50±0,06 <sup>b</sup> | 0,25±0,06 <sup>b</sup> | 0,14±0,06              | 0,07±0,03              | 0,06±0,01              | 0,04±0,01              | 0,03                   | 0,03                   |
|         | NTHi1b              | 1,06±0,03 | 0,54±0,10 <sup>b</sup> | 0,31±0,12 <sup>b</sup> | 0,17±0,09              | 0,08±0,02              | 0,06±0,01              | 0,04                   | 0,04                   | 0,04                   |
|         | NTHi1c              | 1,01±0,08 | 0,45±0,09 <sup>b</sup> | 0,21±0,02 <sup>b</sup> | 0,1±0,04               | 0,05±0,02              | 0,04                   | 0,04                   | 0,04±0,01              | 0,02                   |
| 2       | NTHi2a              | 1,02±0,03 | 0,30±0,07              | 0,14±0,04              | 0,06±0,03              | 0,04±0,01              | 0,03±0,01              | 0,03±0,02              | 0,03±0,02              | 0,02±0,01              |
|         | NTHi2b              | 1,04±0,02 | 0,27±0,15              | 0,1±0,05               | 0,06±0,01              | 0,04±0,02              | 0,03±0,02              | 0,02±0,02              | 0,03±0,02              | 0,02±0,01              |
| 3       | NTHi3a              | 1,03±0,04 | 1,01±0,05 <sup>a</sup> | 1,04±0,02 <sup>a</sup> | 0,98±0,05 <sup>a</sup> | 0,94±0,07 <sup>a</sup> | 0,98±0,06 <sup>a</sup> | 0,92±0,1 <sup>a</sup>  | 0,88±0,08 <sup>a</sup> | 0,89±0,07 <sup>a</sup> |
|         | NTHi3b              | 1,04±0,04 | 1,02±0,05 <sup>a</sup> | 1±0,06 <sup>a</sup>    | 1,02±0,07 <sup>a</sup> | 0,92±0,08 <sup>a</sup> | 0,89±0,18 <sup>a</sup> | 0,86±0,23 <sup>a</sup> | 0,84±0,18 <sup>a</sup> | 0,85±0,22 <sup>a</sup> |
|         | NTHi3c              | 1,02±0,06 | 1,03±0,03 <sup>a</sup> | 1,04±0,06 <sup>a</sup> | 1,02±0,04 <sup>a</sup> | 0,96±0,02 <sup>a</sup> | 0,96±0,04 <sup>a</sup> | 0,94±0,03 <sup>a</sup> | 0,92±0,03 <sup>a</sup> | 0,93±0,03 <sup>a</sup> |
| 5       | NTHi5b              | 1,05±0,01 | 0,41±0,08              | 0,20±0,02              | 0,11±0,02              | 0,07±0,01              | 0,05±0,02              | 0,03±0,02              | 0,02±0,02              | 0,02±0,02              |
| 6       | NTHi6a              | 1,03±0,04 | 0,83±0,11 <sup>c</sup> | 0,58±0,17 <sup>c</sup> | 0,33±0,14              | 0,13±0,04              | 0,08±0,02              | 0,05±0,01              | 0,04±0,02              | 0,03±0,02              |

<sup>a</sup>OD<sub>600nm</sub> values for series isolated from patient 3 were significantly higher (p<0.0001 from 1 h to the end of the assay) than those obtained for the other NTHi strains tested.

<sup>b</sup>OD<sub>600nm</sub> values for NTHi1a, 1b and 1c were significantly higher than those obtained for NTHi2a and 2b at 1 (p<0.0001) and 1,5 h (p<0.001).

<sup>c</sup>NTHi6a presented OD<sub>600nm</sub> values higher than those obtained for strains from patients 1 and 2 at 1-1.5 h (p<0.0001).

**Table S3.** Lipid A structures identified in the NTHi isolates analyzed.

| [M-H] <sup>-</sup> | Fatty acid substitutions |                 |            |            |
|--------------------|--------------------------|-----------------|------------|------------|
|                    | C3'                      | C2'             | C3         | C2         |
| 1824               | 14:0[3-O(14:0)]          | 14:0[3-O(14:0)] | 14:0(3-OH) | 14:0(3-OH) |
| 1744               | 14:0[3-O(14:0)]          | 14:0[3-O(14:0)] | 14:0(3-OH) | 14:0(3-OH) |
| 1388               | OH                       | 14:0[3-O(14:0)] | 14:0(3-OH) | 14:0(3-OH) |

**Table S4.** Summary statistics for draft genome assemblies.

| <b>Features</b>     | <b>RR3131</b> | <b>NTHi1a</b> | <b>NTHi1b</b> | <b>NTHi1c</b> |
|---------------------|---------------|---------------|---------------|---------------|
| # of reads          | 2,349,021     | 13,668,344    | 3,420,997     | 6,535,653     |
| % overlapped        | 19.7%         | 40.1%         | 39.9%         | 29.4%         |
| # contigs           | 21            | 23            | 17            | 16            |
| total length (bp)   | 1,891,683     | 1,787,944     | 1,794,570     | 1,803,206     |
| N50 (bp)            | 198,461       | 224,231       | 246,701       | 247,076       |
| median (bp)         | 36,044        | 24,844        | 38,138        | 51,313        |
| largest contig (bp) | 414,414       | 507,594       | 426,945       | 508,640       |

**Figure S1**

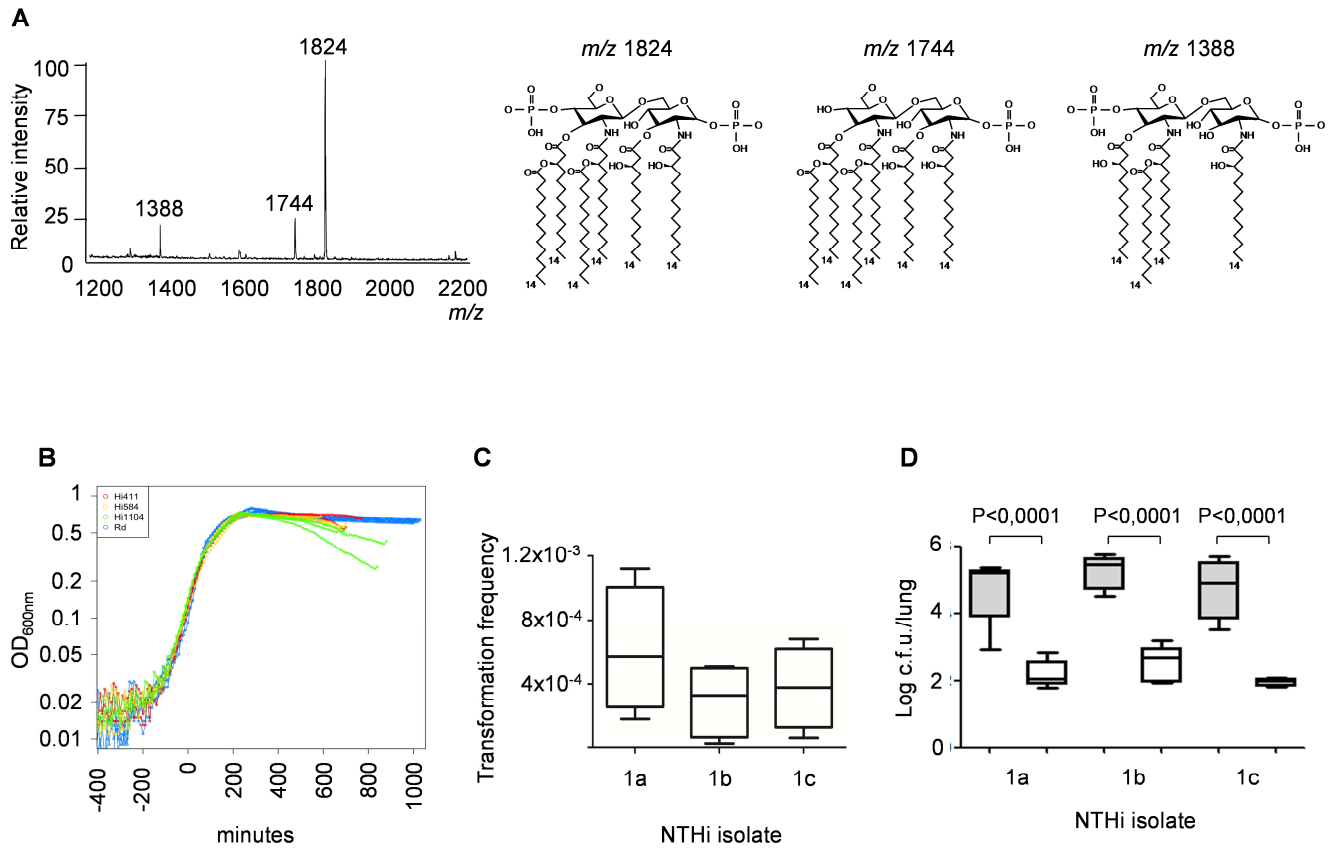

**Figure S2**

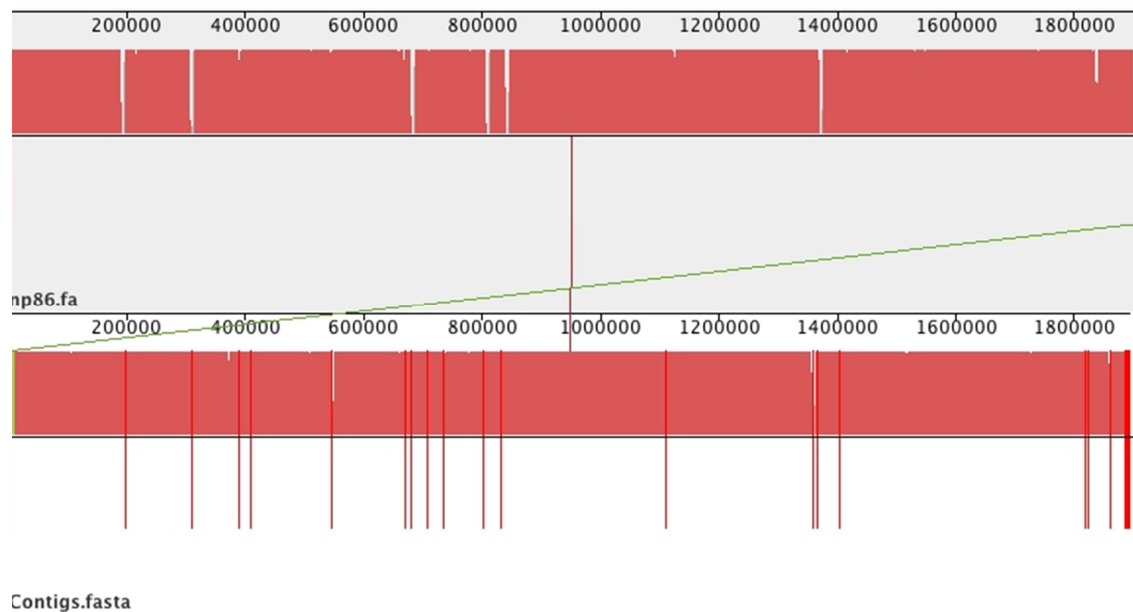

**Figure S3**

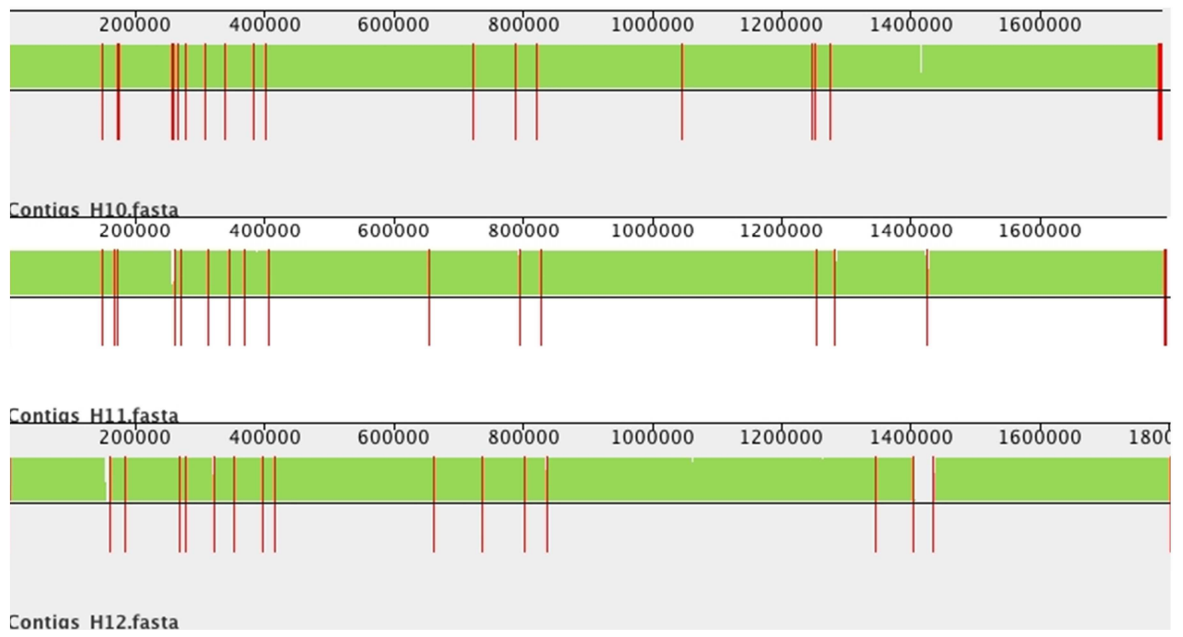

## Figure S4

```

NTHi2a SapC      MQNKEPDEFRESTSIFQIWLRFQNTIALFSFYLLIALIFTALFASYLAPYADNRQFIGQ 60
NTHi2b          MQNKEPDEFRESTSIFQIWLRFQNTIALFSFYLLIALIFTALFASYLAPYADNRQFIGQ 60
NTHi1c          MQNKEPDEFRESTSIFQIWLRFQNTIALFSFYLLIALIFTALFASYLAPYADNRQFIGQ 60
NTHi1b          MQNKEPDEFRESTSIFQIWLRFQNTIALFSFYLLIALIFTALFASYLAPYADNRQFIGQ 60
NTHi1a          MQNKEPDEFRESTSIFQIWLRFQNTIALFSFYLLIALIFTALFASYLAPYADNRQFIGQ 60
NTHi3a          MQNKEPDEFRESTSIFQIWLRFQNTIALFSFYLLIALIFTALFASYLAPYADNRQFIGQ 60
NTHi3b          MQNKEPDEFRESTSIFQIWLRFQNTIALFSFYLLIALIFTALFASYLAPYADNRQFIGQ 60
NTHi3c          MQNKEPDEFRESTSIFQIWLRFQNTIALFSFYLLIALIFTALFASYLAPYADNRQFIGQ 60
                *****

NTHi2a          ELMPPSWVDRGKIAFFFGADDLGRDILSRLIMGTRYTLGSALLVVFVSAIIGGALGIIAG 120
NTHi2b          ELMPPSWVDRGKIAFFFGADDLGRDILSRLIMGTRYTLGSALLVVFVSAIIGGALGIIAG 120
NTHi1c          ELMPPSWVDRGKIAFFFGADDLGRDILSRLIMGTRYTLGSALLVVFVSAIIGGALGIIAG 120
NTHi1b          ELMPPSWVDRGKIAFFFGADDLGRDILSRLIMGTRYTLGSALLVVFVSAIIGGALGIIAG 120
NTHi1a          ELMPPSWVDRGKIAFFFGTDDLGRDILSRLIMGTRYTLGSALLVVFVSAIIGGALGIIAG 120
NTHi3a          ELMPPSWVDRGKIAFFFGTDDLGRDILSRLIMGTRYTLGSALLVVFVSAIIGGALGIIAG 120
NTHi3b          ELMPPSWVDRGKIAFFFGTDDLGRDILSRLIMGTRYTLGSALLVVFVSAIIGGALGIIAG 120
NTHi3c          ELMPPSWVDRGKIAFFFGTDDLGRDILSRLIMGTRYTLGSALLVVFVSAIIGGALGIIAG 120
                *****:*****

NTHi2a          LLKGIKARFVGHIFDAFLSLPILLIAVVI STLMEPSLWNAMFATLLAILPYFIHTIYRAI 180
NTHi2b          LLKGIKARFVGHIFDAFLSLPILLIAVVI STLMEPSLWNAMFATLLAILPYFIHTIYRAI 180
NTHi1c          LLKGIKARFVGHIFDAFLSLPILLIAVVI STLMEPSLWNAMFATLLAILPYFIHTIYRAI 180
NTHi1b          LLKGIKARFVGHIFDAFLSLPILLIAVVI STLMEPSLWNAMFATLLAILPYFIHTIYRAI 180
NTHi1a          LLKGIKARFVGHIFDAFLSLPILLIAVVI STLMEPSLWNAMFATLLAILPYFIHTIYRAI 180
NTHi3a          LLKGIKARFVGHIFDAFLSLPILLIAIVI STLMEPSLWNAMFATLLAILPYFIHAIYQAI 180
NTHi3b          LLKGIKARFVGHIFDAFLSLPILLIAIVI STLMEPSLWNAMFATLLAILPYFIHAIYQAI 180
NTHi3c          LLKGIKARFVGHIFDAFLSLPILLIAIVI STLMEPSLWNAMFATLLAILPYFIHAIYQAI 180
                *****:*****:***

NTHi2a          QKELEKDYVVMLKLEGISNQALLKSTILPNITVIYIQEVAHAFVIAVLDISALSFISLGA 240
NTHi2b          QKELEKDYVVMLKLEGISNQALLKSTILPNITVIYIQEVAHAFVIAVLDISALSFISLGA 240
NTHi1c          QKELEKDYVVMLKLEGISNQALLKSTILPNITVIYIQEVAHAFVIAVLDISALSFISLGA 240
NTHi1b          QKELEKDYVVMLKLEGISNQALLKSTILPNITVIYIQEVAHAFVIAVLDISALSFISLGA 240
NTHi1a          QKELEKDYVVMLKLEGISNQALLKSTILPNITVIYIQEVAHAFVIAVLDISALSFISLGA 240
NTHi3a          QQELKKDYVVMLKLEGISNWELLKSTILPNITVIYIQEVARAFVIAVLDISALSFISLGA 240
NTHi3b          QQELKKDYVVMLKLEGISNWELLKSTILPNITVIYIQEVARAFVIAVLDISALSFISLGA 240
NTHi3c          QQELKKDYVVMLKLEGISNWELLKSTILPNITVIYIQEVARAFVIAVLDISALSFISLGA 240
                *:***:***** *****:*****

NTHi2a          QRPTPEWGAMIKDSLELLYLAPWTVLLPGFAIIFTILLSIIFSNGLTKAINQHQE 295
NTHi2b          QRPTPEWGAMIKDSLELLYLAPWTVLLPGFAIIFTILLSIIFSNGLTKAINQHQE 295
NTHi1c          QRPTPEWGAMIKDSLELLYLAPWTVLLPGFAIIFTILLSIIFSNGLTKAINQHQE 295
NTHi1b          QRPTPEWGAMIKDSLELLYLAPWTVLLPGFAIIFTILLSIIFSNGLTKAINQHQE 295
NTHi1a          QRPTPEWGAMIKDSLELLYLAPWTVLLPGFAIIFTILLSIIFSNGLTKAINQHQE 295
NTHi3a          QRPTPEWGAMIRDSLELLYLAPWTVLLPGFAIIFTILLSIIFSNGLTKTINQHQE 295
NTHi3b          QRPTPEWGAMIRDSLELLYLAPWTVLLPGFAIIFTILLSIIFSNGLTKTINQHQE 295
NTHi3c          QRPTPEWGAMIRDSLELLYLAPWTVLLPGFAIIFTILLSIIFSNGLTKTINQHQE 295
                *****:*****

```



Figure S5

**NTHi1b Kdka** MHQFQQDNQYFIFNFDRTF**E**QATEFFQAEFWQKQER**V**IGSAKGRG**T**TYFLQTEDWFGVNC 60  
**NTHi1c** MHQFQQDNQYFIFNFDRTF**E**QATEFFQAEFWQKQER**V**IGSAKGRG**T**TYFLQTEDWFGVNC 60  
**NTHi1a** MHQFQQDNQYFIFNFDRTF**E**QATEFFQAEFWQKQER**V**IGSAKGRG**T**TYFLQTEDWFGVNC 60  
**NTHi2a** MHQFQQDNQYFIFNFDRTF**E**QATEFFQAEFWQKQER**V**IGSAKGRG**T**TYFLQTEDWFGVNC 60  
**NTHi2b** MHQFQQDNQYFIFNFDRTF**E**QATEFFQAEFWQKQER**V**IGSAKGRG**T**TYFLQTEDWFGVNC 60  
**NTHi3b** MHQFQQDNQYFIFNFDRTF**D**QATEFFQAEFWQKQER**L**IGSAKGRG**I**TYFLQTEDWFGVNC 60  
**NTHi3c** MHQFQQDNQYFIFNFDRTF**D**QATEFFQAEFWQKQER**L**IGSAKGRG**I**TYFLQTEDWFGVNC 60  
\*\*\*\*\*:\*\*\*\*\*:\*\*\*\*\* \*\*\*\*\*

**NTHi1b** ALRHYRGGLWGKLNKDRYRFSAL**D**TTRSFAEFHLLQRLYEAGLPVPKPIAARIQKGKLG 120  
**NTHi1c** ALRHYRGGLWGKLNKDRYRFSAL**D**TTRSFAEFHLLQRLYEAGLPVPKPIAARIQKGKLG 120  
**NTHi1a** ALRHYRGGLWGKLNKDRYRFSAL**D**TTRSFAEFHLLQRLYEAGLPVPKPIAARIQKGKLG 120  
**NTHi2a** ALRHYRGGLWGKLNKDRYRFSAL**D**TTRSFAEFHLLQRLYEAGLPVPKPIAARIQKGKLG 120  
**NTHi2b** ALRHYRGGLWGKLNKDRYRFSAL**D**TTRSFAEFHLLQRLYEAGLPVPKPIAARIQKGKLG 120  
**NTHi3b** ALRHYRGGLWGKLNKDRYRFSAL**E**TTRSFAEFHLLQRLYEAGLPVPKPIAARIQKGKLG 120  
**NTHi3c** ALRHYRGGLWGKLNKDRYRFSAL**E**TTRSFAEFHLLQRLYEAGLPVPKPIAARIQKGKLG 120  
\*\*\*\*\*:\*\*\*\*\*:\*\*\*\*\* \*\*\*\*\*

**NTHi1b** ICYQADILTEKIENAQDLTALLQTQTLPKETW**R**QIGRLIRKLHDLQICHTDLNAHNILLQ 180  
**NTHi1c** ICYQADILTEKIENAQDLTALLQTQTLPKETW**R**QIGRLIRKLHDLQICHTDLNAHNILLQ 180  
**NTHi1a** ICYQADILTEKIENAQDLTALLQTQTLPKETW**R**QIGRLIRKLHDLQICHTDLNAHNILLQ 180  
**NTHi2a** ICYQADILTEKIENAQDLTALLQTQTLPKETW**R**QIGRLIRKLHDLQICHTDLNAHNILLQ 180  
**NTHi2b** ICYQADILTEKIENAQDLTALLQTQTLPKETW**R**QIGRLIRKLHDLQICHTDLNAHNILLQ 180  
**NTHi3b** ICYQADILTEKIENAQDLTALLQTQTLPKETW**T**QIGRLIRKLHDLQICHTDLNAHNILLQ 180  
**NTHi3c** ICYQADILTEKIENAQDLTALLQTQTLPKETW**T**QIGRLIRKLHDLQICHTDLNAHNILLQ 180  
\*\*\*\*\*:\*\*\*\*\*:\*\*\*\*\* \*\*\*\*\*

**NTHi1b** QAEQEQKCWL**L**DFDKC**G**EKSGDFWKAQNLNRLKRSFEKEVGRMNI**H**FTEQNWADLT**A**AYHQ 241  
**NTHi1c** QAEQEQKCWL**L**DFDKC**G**EKSGDFWKAQNLNRLKRSFEKEVGRMNI**H**FTEQNWADLT**A**AYHQ 241  
**NTHi1a** QAEQEQKCWL**L**DFDKC**G**EKSGDFWKAQNLNRLKRSFEKEVGRMNI**Q**FTEQNWADLT**A**AYHQ 241  
**NTHi2a** QAEQEQKCWL**L**DFDKC**G**EKSGDFWKAQNLNRLKRSFEKEVGRMNI**Q**FTEQNWADLT**S**AYHQ 241  
**NTHi2b** QAEQEQKCWL**L**DFDKC**G**EKSGDFWKAQNLNRLKRSFEKEVGRMNI**Q**FTEQNWADLT**S**AYHQ 241  
**NTHi3b** QAEQEQKCWL**I**DFDKC**G**KKSGDFWQVQNLNRLKRSFEKEVGRMNI**Q**FTEQNWADLT**S**AYHQ 241  
**NTHi3c** QAEQEQKCWL**I**DFDKC**G**KKSGDFWQVQNLNRLKRSFEKEVGRMNI**Q**FTEQNWADLT**S**AYHQ 241  
\*\*\*\*\*:\*\*\*\*\*:\*\*\*\*\* \*\*\*\*\*
